# Supplementary material
Source: PubMed Central journal article supplement (PMC5567545)
Supplement: 12264_2016_77_MOESM1_ESM.pdf [file 12264_2016_77_MOESM1_ESM.pdf]

## Supplementary materials

### 1. Pseudocode of the proposed method

The pseudocodes of the training and the test phases are described in Fig. 1.

```
Function Training_Phase(training_data)
  (Feature space selection)
  feature_space is selected in training_data by feature space selection
  for each class-pair  $CP_{ij}$ 
    (Feature vector selection)
    for each location  $l \in \text{feature\_space}$ 
      for each searchlight window  $w$ 
         $\text{perf}(w) =$  leave-one-trial-out cross-validation performance of  $CP_{ij}$  using a
          feature vector inside  $w$  centered on  $l$ 
      end
       $\text{best\_window}(CP_{ij}, l) = \text{argmax}_w \text{perf}(w)$ 
       $\text{reliability}(CP_{ij}, l) = \text{perf}(\text{best\_window}(CP_{ij}, l))$ 
    end
    for  $k = 1$  to maximum number of sub-classifiers
       $\text{ensemble\_perf}(k) =$  leave-two-trial-out cross-validation performance of  $CP_{ij}$ 
        using  $k$  most reliable feature vectors
    end
     $M(CP_{ij}) = \text{argmax}_k \text{ensemble\_perf}(k)$ 
    (Multiple sub-classifiers)
    for  $n = 1$  to  $M(CP_{ij})$ 
      The sub-classifier  $SC(CP_{ij}, n)$  is constructed with  $n$ -th reliable feature vector
        based on  $\text{reliability}(CP_{ij}, l)$  and  $\text{best\_window}(CP_{ij}, l)$ .
    end
  end
Return  $SC, M$ 
```

```
Function Test_Phase(test_data,  $SC, M$ )
  for each class-pair  $CP_{ij}$ 
    (Multiple sub-classifiers)
    for  $n = 1$  to  $M(CP_{ij})$ 
       $P(CP_{ij}, i, n) =$  probability that test_data is class  $i$ , estimated by  $SC(CP_{ij}, n)$ 
       $P(CP_{ij}, j, n) =$  probability that test_data is class  $j$ , estimated by  $SC(CP_{ij}, n)$ 
    end
    (Voting values for two classes)
    for each class-pair  $CP_{ij}$ 
       $V(CP_{ij}, i) = \sum_n P(CP_{ij}, i, n) / M(CP_{ij})$ 
       $V(CP_{ij}, j) = \sum_n P(CP_{ij}, j, n) / M(CP_{ij})$ 
    end
  end
  for each class  $i$ 
     $\text{sum\_vote}(i) =$  sum of vote for  $i$  from all class-pair related to  $i$ 
  end
   $\text{Estimated\_Class} = \text{argmax}_i \text{sum\_vote}(i)$ 
Return Estimated_Class
```

## 2. Feature space selection methods

The five feature selection methods were as follows:

- a) Whole brain: All of the voxels in the brain region were selected as the feature space.
- b) Analysis of variance (ANOVA): ANOVA evaluates the usefulness of each voxel by measuring the consistency of intensity variation with respect to stimuli. Using the ANOVA criteria, the most informative 1000 voxels were selected to be used as the feature space.
- c) Support vector machine (SVM): Initially the voxels are ranked according to the absolute values of the weights, and subsequently, the most influential voxels in the construction of the decision boundary are identified<sup>[18]</sup>. Finally, a total of 1000 voxels were selected from among the classifiers for every class.
- d) Recursive feature elimination (RFE): In the RFE, the voxels that are estimated to have less information are eliminated from the feature space through iterations<sup>[18]</sup>. In each iteration, the voxels were ranked and selected using the same method as that for SVM feature selection, and 5% of the less informative voxels were eliminated at each iteration until the number of remaining voxels reached 1000.
- e) Ventral temporal cortex (VTC) mask: The VTC region of the brain is known to be responsible for the classification of visually-presented objects. In this paper, we applied VTC masks provided along with the dataset (details refer to 2.2.2. fMRI dataset). For inter-subject analysis, the mask for one subject was registered into the standard space.

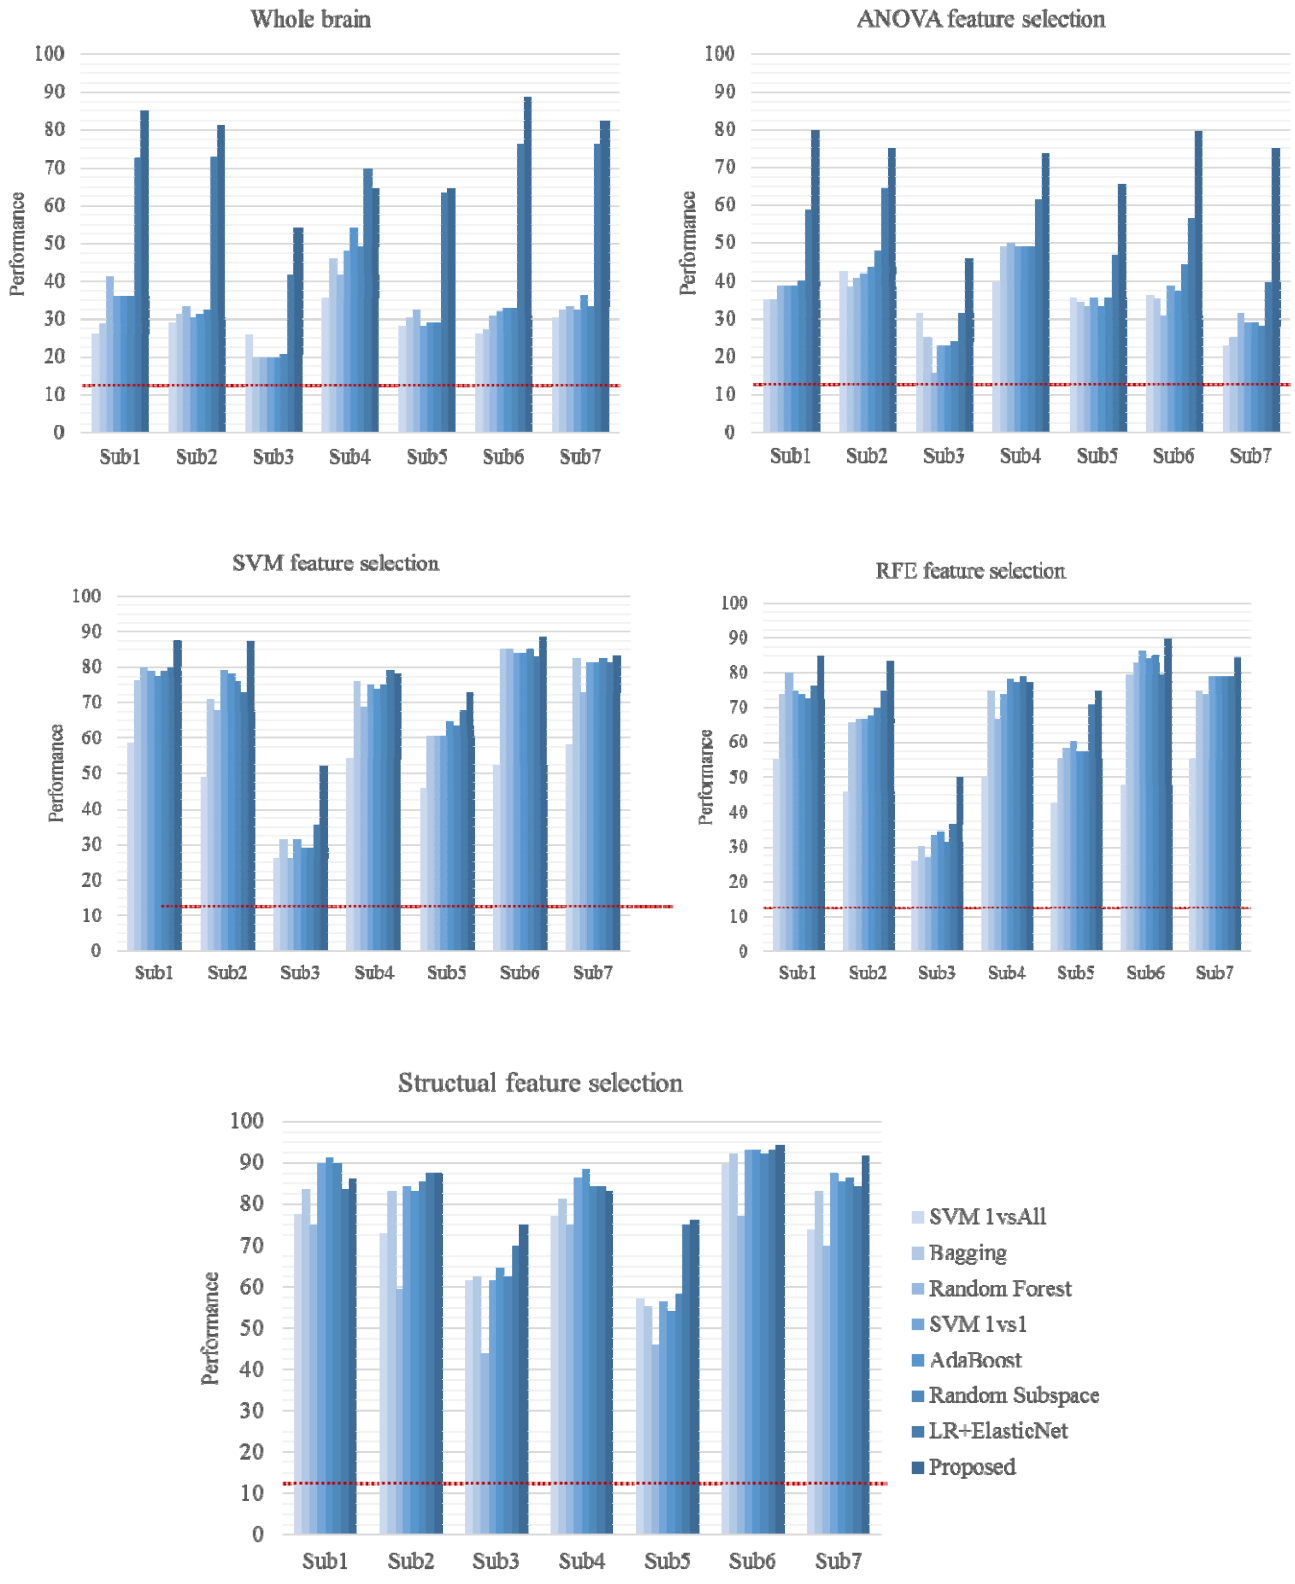

Fig. S1. The detailed performances for individual intra-subject classification. The dotted line indicates the chance level of 12.5% for eight classes.
